# Supplementary material for: A novel family of γ-gliadin genes are highly regulated by nitrogen supply in developing wheat grain
Source: PubMed Central journal article supplement — J Exp Bot. 2012 Nov 16;64(1):161–8. doi: 10.1093/jxb/ers318 (PMC3528027; doi:10.1093/jxb/ers318), 2012-11-16

A novel family of  $\gamma$ -gliadin genes are highly regulated by nitrogen supply in developing wheat grain

Yongfang Wan, Peter R Shewry and Malcolm J Hawkesford

Supplementary Table S1. Primers used for PCR sequencing and real time RT-PCR.

| <b>gene</b>     | <b>primer name</b> | <b>primer sequence</b>           | <b>PCR</b>       |
|-----------------|--------------------|----------------------------------|------------------|
| He-1            | He-1F              | 5-AAC AAT CAA GAG TAA CCA CAA-3  | sequencing       |
|                 | He-1R              | 5- TAG TAC AAC TAT TGT GAT TTC-3 |                  |
| He-2            | He-2F              | 5'-ACAGAGTAACCACAAATCCAT-3'      | sequencing       |
|                 | He-2R              | 5'-TTTCATTTCACTGTCCACCGTTCAT-3'  |                  |
| He-1            | He-FQ              | 5'-ACAGCTGCCAGTTGAAGCG-3'        | Real-time RT-PCR |
|                 | He-RQ              | 5'-GACGATGGCATGCACAATGT-3'       |                  |
| Ta.2526.1.S1_at | Ta.2526-F          | 5'-AGAATGGGATGACAAGGAAGA-3'      | Real-time RT-PCR |
|                 | Ta.2526-R          | 5'-TCCTCCCATTGCTGGACAG-3'        |                  |

Supplementary Table S2. Nitrogen contents of grains grown at Rothamsted in 2009 and 2010 (all means of three replicate plots, with standard deviation of the mean in parenthesis).

| 2009 | Cordiale    | Hereward    | Istabraq    | Malacca     | Marksman    | Xi-19       |
|------|-------------|-------------|-------------|-------------|-------------|-------------|
| N100 | 1.58 (0.12) | 1.65 (0.06) | 1.40 (0.06) | 1.49 (0.06) | 1.52 (0.05) | 1.54 (0.08) |
| N200 | 1.96 (0.14) | 2.16 (0.16) | 1.85 (0.07) | 1.93 (0.07) | 2.04 (0.08) | 1.94 (0.11) |
| N350 | 2.26 (0.03) | 2.44 (0.01) | 2.06 (0.04) | 2.25 (0.06) | 2.28 (0.05) | 2.23 (0.08) |

| 2010 | Cordiale    | Hereward    | Istabraq    | Malacca     | Marksman    | Xi-19       |
|------|-------------|-------------|-------------|-------------|-------------|-------------|
| N100 | 1.54 (0.02) | 1.64 (0.01) | 1.44 (0.04) | 1.58 (0.05) | 1.52 (0.07) | 1.55 (0.05) |
| N200 | 2.21 (0.05) | 2.31 (0.03) | 1.93 (0.04) | 2.15 (0.07) | 2.11 (0.03) | 2.13 (0.05) |
| N350 | 2.30 (0.02) | 2.44 (0.03) | 1.99 (0.04) | 2.24 (0.02) | 2.28 (0.04) | 2.26 (0.08) |

Supplementary Table S3. Probesets for  $\gamma$ -gliadin transcripts on the Affymetrix GeneChip® Wheat Genome Array.

---

| Typical gamma-gliadin probe sets |                         |
|----------------------------------|-------------------------|
| Ta.24114.8.S1_x_at               | TaAffx.128418.2.S1_x_at |
| Ta.30782.2.S1_x_at               | Ta.30782.9.S1_x_at      |
| Ta.23142.4.S1_s_at               | Ta.24114.14.S1_x_at     |
| Ta.30782.4.S1_at                 | Ta.23142.7.S1_x_at      |
| Ta.160.3.S1_x_at                 | Ta.23142.11.S1_x_at     |
| Ta.28632.1.S1_x_at               | TaAffx.79378.1.S1_at    |
| Ta.24114.8.S1_at                 | Ta.28792.1.S1_x_at      |

---

| Novel gamma-gliadin probe sets |                   |
|--------------------------------|-------------------|
| Ta.6175.1.S1_at                | Ta.9940.1.A1_at   |
| Ta.6175.1.S1_x_at              | Ta.6175.2.A1_x_at |

---

Supplementary Table S4. Assembled DNA sequences of three novel  $\gamma$ -gliadin genes from Chinese Spring. Start and stop codons are boxed.

CS-1: ACGAGTGC GTTACACTTGTAAAGTAGCGCCACCGAACAAAACATACCAAAG  
GATCAGTTTGATAAGAGTAGAGGAACTTTAACAAGAAAAGACAAATAGTGA  
AGACGAAAAGAAATACATTTTCATGGCAGCTATAAATAGCCATACGCCATG  
AAGACCCCTTCCATCATCCATCCTTCAGAAATTTGGAGCACAAGCATCC  
ATAATAAACAATCAAGAGTAACCACAAATTCACCAATGAGATCTTCATGG  
TCTTTGCCCTCCTCGTTGCATCAACGACCATCACCACCGCGACCGCACAG  
CTCGACCTCGCATCCATGACCAAGAAAAGGCCACAACAATCGTTTCTGCA  
ACAGCAACCCTTATCCAGCAACAACCATAACCGCTCAAGAGCCACAAC  
AACCCTATTCCCGCAAAAAGAGCCACAACAACCATTTCGCTGCAGCAG  
CCACAATACCAGCAACAACAACCGTATCCACAACAACCCTTCCCAAGA  
ACAACCTTCCCGCAGCAACATTTATTTCCGCGAGCAGCCGCCACAACAAT  
TTCCACAACAGATGCCACTTCCGCATCAACAACAACATTCCCGCAACAA  
CAACAACAACAAGAACAACCTCCCAACAACAACCACAATTCCCGCAACA  
ACAACCATTTTCCCAATATCAACAACCATTAACACAACAACCATACTCGC  
AAGAGCAACCATTGCCACAACAACAACCTTCTGTAGAGGAAAAACAACAA  
TTGAACTTGTGCAAGGAGTTCTCCTGCAGCAGTGTAACCCAGAGGAGAA  
ACTGTGCTTACTCCAGTCAGTGATCCCGTTCTCCGACCAAGACCTCGC  
AACAGAACAGCTGCCAGTTGAAGCGACTACAATGTTGTCGACAACCTGCA  
CATATCAGTGAACCGTCCCGATGCCCGGCCATCCACAACATTTGTGCATGC  
CATCGTCATGCAACAACAACATGTGGATAGAGGTTTCGGCCAGCCTCAAC  
CACAACAGTTGGGCCAGGAAATGCCCATGCAGCCTCAACATCAATTGGGC  
CAGCACTCTATCCTACCTCAACAACCTAGCCAGTACCAGTTGGTTAGGTT  
ACTTGTGATTTCAGACCCTTCTATGTTATGCAACGTGCATGTCCCGTCTG  
ATTGCTACACCATTACTGCACCATTGGTAGCATGACTGCCTACAATGGT  
GGACAAATGAATCACAATAGTTGTACTACTAGATAGATGGACCTTCATTG  
TTTACTCGATTGGACGATCGATGTAGCAATGAAATAAAAATAAAATGCCGT  
GCACCATCATATGCGTGAACCAACAGTACAAGTTCAAACCTGGGAATA  
AAGGCAAAACAATAATTCACGTCATGCACATCTACTTTGATAGGAACTG  
CAATCCATCGATTATGTATCATTTTTTTTCATAGGTATATCAACCCAGTCC  
CACCATGTGATGTCAAAAAAGGAACCTCCTTATCCGAAAATTTAGTTCA  
G

CS-2: AATATGATGAGTCATTACGATTATCAAGCTTTCTGACACTCCATGGATG  
TGTGCTACAAGAAAGCAACTTTGGCGATTAATCCAAATTACACTTGCAAG  
TAGCCCTGCGAAGATAGTTTGATAAGAGTATCAGAACTTTACAAGAAAAGA  
AAATATGAAGACGAAAAGAAATCATTTCATGGCATCTATAAATAGCCATA  
CACCGTGAAGACCCCTTCCATGATCCATCTTTCACACATTTAGAGCACA  
AACATTCAAAATAACAATAACAGAGTAACCACAAATCCATCATGAAGATC  
CTCTTGGTCTTTGCCCTCCTCGTTGTATCAACGACCATCACCACCGCGAT  
CGTGCAGCTCGACCTAGTGTCCATGTCCAAGAAAGGCCACAACAATCAT  
TTCTGCAGCAGCAACCCTTACCCAGCAACAACCATTGCCGCTGCAAGAA  
CCACAACAACCCTATTCCCGCAAAAAGAGCCACAACAACCATTTTCGCT  
GCAGCAACCACAACCCAGGAACAACAACCATATCCACAACAGCCACTTC  
TCCAACAACAACCTTCCCGCAACATCTATTCCCGCGAGCAGCCACCACAA  
CAACAATTTCCGCGAGCAGATGCCACTTCCATATGAACAACAACATTTCCC  
GCAACAACAGCAACAGCAACCACAATTCCCGCAACAACAACCATTTCCC  
AATATCAACAACCATTAACACAACAACCATAACCCGCAAGAGCAACCATTG  
CCACAACAACAACCTTCTGTGGAGGAAAAACAACAATTTGAACCTTGTGCAA  
GGAGTTCTCCTGCAACAGTGCAACCCGGAGGAGAACTGTCATTAATCC  
AGTCAGTGATCCCGTTCTCCGACCAAGACCTCGCAACAGAAATAGCTGC  
CAGTTGAAGCGTCTACAATGTTGTCGACAACCTTGACGTATCAATGAACC  
GTCCCGATGCCCGGCCATCCACAACATTTGTGCATGCCATCGTCATGCAAC  
AACAACATGTGGATAGAGGTTTCGGCCAGCCTCAACCACAACAGTTGGGC  
CAGGGAATGCCATGCAGCCTCAATATCAATTTGGGCCAGGGCTTTATCCT  
ACCTCAACAACATGCCCAGTTCAAGTTGGTTAGGTTACTTGTGATTCAGA  
CCCTGCCTATGTTATGCAACGTGCATGTCCCATCTGACTGCTACACCCT  
AGTGCACCATTTGGTAGCATGACTGCCATGAACGGTGGACAGTGAATGA  
AAACAGTTGTACTACTAGATAGATGGACCTTCATTGTTTACTCGATTGGA

CGATCGATGTAGCAATAAAAAAAAAATATAAAATGTCATGCACCATCATATG  
TGTGACTCCAACCAA

CS-3: TCCTGACACTCCATGGATGTGTGCTACCAGAAAGCAACTTTGGCGATCAA

TCCAAAAATTACACTTGTAAGTAGCGCCACCGAACAAAACATACCAAAGA  
ATCAGTTTTGATACGAGTAGAGGAACTTTACAAGAAAGCAAATGTGAAGAC  
GAAGAGAAATCATTTTCATGGCCGTATAAATAGCCATACACCATGAAGAC  
CCCCTCCCATCCTCCATCCTTCACACATTTGGAGCACAAAATTCACACT  
AAACAATCAAGAGTAACCAAAAAATCCACCATGAAGATCTTCTTGGTCTTT  
GCCCTCCTCGTTGTATCAACGATCATCACCACCGCGACCGCGCAGCTCGA  
CCCTAGCATCCATGTACAAGAAAGGCCACAACAATCGTTTCCGCAGCAGC  
AACCATTACCCAACAACAACCATTCCCCGCTGCAAGAGCCACAACAACCA  
CTATTCCAGCAACAACAACCATTCCACAACAGTCACTTCGCCAACAACA  
ACTTCCCCAGCAACATTTATTTCCGCAGCAACCGCCGAACAACAATTTTC  
CATAGTAGATGCCACTTCCGCATCAACAACAATAATTCCCCGAACAACA  
CAACCCCAACAACAACAACCATTTTACCAATATCAACAACCATTAACACA  
ACAACCATACACGCGAGAGCAACCATTGCCACAACAACAACCTTCTGTGG  
AGGAAAACCAACAATTGAACTTGTGCAAGGAGTTCTGCTGCAGCAGTGC  
AACCCGGAGGAGAAAGTGCATTACTGCAGTCAATGATCCCGTTCCTCCG  
ACCAAAGACCTCGCAACAGAACAACACTGCCAGTTGAAGCGGCAACAATGTT  
GTCGACAACCTTGACATATCAGCGAGCCGTCCCGATGTCCGGCCATCCAC  
AACATTGTGCACGCCATCATCATGCAACAACAACAACAACATGTGGATAG  
AGGTTTTCGTCCAGCCTCAACCACAACAGTTGGGCCAGGGAATGCCCATGC  
AGCCTCAACATCAATTGGGCCAGGGCTTAAGCCTACCTCAACAACCTAGCC  
CAGTTCAAGTTGGTTAGGTTACTTGTGATTTCAGACCTTGCCTATGTTATG  
CAATGTGCATGTCCCATCTGATTGCTACACCATTAGTGCACCATTTGGTG  
GCATCACTGCCTACAACGGTGGACAAATGAATCACAAGAGTTGTACTACT  
AT

Supplementary Table S5. Numbers of amino acid residues and calculated molecular weights of the mature  $\gamma$ -gliadin proteins.

|                       |              |      | B genome |      | D genome |      |      | A genome |      |
|-----------------------|--------------|------|----------|------|----------|------|------|----------|------|
|                       | CS- $\gamma$ | HC   | CS-2     | He-2 | Ae       | CS-1 | He-1 | CS-3     | Tm   |
| amino acid residues   | 276          | 264  | 298      | 298  | 305      | 305  | 308  | 280      | 284  |
| molecular weight (kD) | 31.6         | 30.1 | 34.6     | 34.3 | 35.5     | 35.6 | 36   | 32.2     | 32.9 |

Supplementary Table S6. Sequence similarity of the mature  $\gamma$ -gliadin proteins.

|              | CS- $\gamma$ | HC      | B genome |         | D genome |         |         | A genome |         |
|--------------|--------------|---------|----------|---------|----------|---------|---------|----------|---------|
|              |              |         | CS-2     | He-2    | Ae       | CS-1    | He-1    | CS-3     | Tm      |
| CS- $\gamma$ | 100.00%      | 41.30%  | 46.00%   | 45.30%  | 45.50%   | 44.90%  | 44.40%  | 44.70%   | 45.00%  |
| HC           | 41.30%       | 100.00% | 65.50%   | 64.50%  | 62.10%   | 62.40%  | 61.80%  | 66.70%   | 68.30%  |
| CS-2         | 46.00%       | 65.50%  | 100.00%  | 94.60%  | 87.90%   | 87.90%  | 87.10%  | 81.10%   | 81.30%  |
| He-2         | 45.30%       | 64.50%  | 94.60%   | 100.00% | 85.60%   | 85.00%  | 84.10%  | 79.40%   | 79.70%  |
| Ae           | 45.50%       | 62.10%  | 87.90%   | 85.60%  | 100.00%  | 98.70%  | 97.70%  | 80.20%   | 80.80%  |
| CS-1         | 44.90%       | 62.40%  | 87.90%   | 85.00%  | 98.70%   | 100.00% | 98.40%  | 80.20%   | 80.80%  |
| He-1         | 44.40%       | 61.80%  | 87.10%   | 84.10%  | 97.70%   | 98.40%  | 100.00% | 79.70%   | 80.30%  |
| CS-3         | 44.70%       | 66.70%  | 81.10%   | 79.40%  | 80.20%   | 80.20%  | 79.70%  | 100.00%  | 95.10%  |
| Tm           | 45.00%       | 68.30%  | 81.30%   | 79.70%  | 80.80%   | 80.80%  | 80.30%  | 95.10%   | 100.00% |

Supplementary Table S4. Assembled DNA sequences of three novel  $\gamma$ -gliadin genes from Chinese Spring. Start and stop codons are boxed.

CS-1: ACGAGTGC GTTACACTTGTAAAGTAGCGCCACCGAACAAAACATACCAAAG  
GATCAGTTTGATAAGAGTAGAGGAACTTTAACAAGAAAAGACAAATAGTGA  
AGACGAAAAGAAATACATTTTCATGGCAGCTATAAATAGCCATACGCCATG  
AAGACCCCCTTCCATCATCCATCCTTCAGAAATTTGGAGCACAAGCATCC  
ATAATAAACAATCAAGAGTAACCACAAATTCACCAATGAGATCTTCATGG  
TCTTTGCCCTCCTCGTTGCATCAACGACCATCACCACCGCGACCGCACAG  
CTCGACCCTCGCATCCATGACCAAGAAAAGGCCACAACAATCGTTTCTGCA  
ACAGCAACCCTTATCCAGCAACAACCATAACCGCTCAAGAGCCACAAC  
AACCCTATTCCCGCAAAAAGAGCCACAACAACCATTTCCGCTGCAGCAG  
CCACAATACCAGCAACAACAACCGTATCCACAACAACCCTTCCCAAGA  
ACAACCTTCCCGCAGCAACATTTATTTCCGCGAGCAGCCGCCACAACAACAT  
TTCCACAACAGATGCCACTTCCGCATCAACAACAACATTTCCCGCAACAA  
CAACAACAACAAGAACAACCTCCCAACAACAACCACAATTTCCCGCAACA  
ACAACCATTTTCCCAATATCAACAACCATTAACACAACAACCATACTCGC  
AAGAGCAACCATTGCCACAACAACAACCTTCTGTAGAGGAAAAACAACAA  
TTGAACTTGTGCAAGGAGTTCTCCTGCAGCAGTGTAAACCCAGAGGAGAA  
ACTGTGCTTACTCCAGTCAGTGATCCCGTTCTCCGACCAAGACCTCGC  
AACAGAACAGCTGCCAGTTGAAGCGACTACAATGTTGTGCAACTTGCA  
CATATCAGTGAACCGTCCCGATGCCCGGCCATCCACAACATTTGTGCATGC  
CATCGTCATGCAACAACAACATGTGGATAGAGGTTTCGGCCAGCCTCAAC  
CACAACAGTTGGGCCAGGAAATGCCCATGCAGCCTCAACATCAATTTGGGC  
CAGCACTCTATCCTACCTCAACAACCTAGCCAGTACCAGTTGGTTAGGTT  
ACTTGTGATTTCAGACCCTTCCATGTTATGCAACGTGCATGTCCCGTCTG  
ATTGCTACACCATTACTGCACCATTTGGTAGCATGACTGCCTACAATGGT  
GGACAAATGAATCACAATAGTTGTACTACTAGATAGATGGACCTTCATTG  
TTTACTCGATTGGACGATCGATGTAGCAATGAAATAAAAATAAAATGCCGT  
GCACCATCATATGCGTGAACCAACCAGTACAAGTTCAAACCTTGGGAATA  
AAGGCAAAACAAAATATTCCACGTCATGCACATCTACTTTGATAGGAACTG  
CAATCCATCGATTATGTATCATTTTTTTTCATAGGTATATCAACCCAGTCC  
CACCATGTGATGTCAAAAAAGGAACCTCCTTATCCGAAAAATTTAGTTCA  
G

CS-2: AATATGATGAGTCATTACGATTATCAAGCTTTCTGACACTCCATGGATG  
TGTGCTACAAGAAAGCAACTTTGGCGATTAATCCAAATTACACTTGCAAG  
TAGCCCTGCGAAGATAGTTTGATAAGAGTATCAGAACTTTACAAGAAAAGA  
AAATATGAAGACGAAAAGAAATCATTTCATGGCATCTATAAATAGCCATA  
CACCGTGAAGACCCCCTTCCATGATCCATCTTTCACACATTTAGAGCACA  
AACATTCAAAATAACAATAACAGAGTAACCACAAATCCATCATGAAGATC  
CTCTTGGTCTTTGCCCTCCTCCTGTATCAACGACCATCACCACCGCGAT  
CGTGCAGCTCGACCTAGTGTCCATGTCCAAGAAAGGCCACAACAATCAT  
TTCTGCAGCAGCAACCCTTACCCAGCAACAACCATTGCCGCTGCAAGAA  
CCACAACAACCCTATTTCCCGCAAAAAGAGCCACAACAACCATTTTCGCT  
GCAGCAACCACAACCCAGGAACAACAACCATATCCACAACAGCCACTTC  
TCCAACAACAACCTTCCCGCAACATCTATTTCCCGCAGCAGCCACCACAA  
CAACAATTTCCGCGAGCAGATGCCACTTCCATATGAACAACAACATTTCCC  
GCAACAACAGCAACAGCAACCACAATTTCCGCAACAACAACCATTTCCC  
AATATCAACAACCATTAACACAACAACCATAACCCGCAAGAGCAACCATTG  
CCACAACAACAACCTTCTGTGGAGGAAAAACAACAATTTGAACCTTGTGCAA  
GGAGTTCTCCTGCAACAGTGAACCCGGAGGAGAACTGTCATTAATCC  
AGTCAGTGATCCCGTTCTCCGACCAAGACCTCGCAACAGAAATAGCTGC  
CAGTTGAAGCGTCTACAATGTTGTGCAACTTGCACGTATCAATGAACC  
GTCCCGATGCCCGGCCATCCACAACATTTGTGCATGCCATCGTCATGCAAC  
AACAACATGTGGATAGAGGTTTCGGCCAGCCTCAACCACAACAGTTGGGC  
CAGGGAATGCCATGCAGCCTCAATATCAATTTGGGCCAGGGCTTTATCCT  
ACCTCAACAACATGCCCAGTTCAAGTTGGTTAGGTTACTTGTGATTCAGA  
CCCTGCCTATGTTATGCAACGTGCATGTCCCATCTGACTGCTACACCCT  
AGTGCACCATTTGGTAGCATGACTGCCATGAACGGTGGACAGTGAATGA  
AAACAGTTGTACTACTAGATAGATGGACCTTCATTGTTTACTCGATTGGA



CGATCGATGTAGCAATAAAAAAAAAATATAAAATGTCATGCACCATCATATG  
TGTGACTCCAACCAA

CS-3: TCCTGACACTCCATGGATGTGTGCTACCAGAAAGCAACTTTGGCGATCAA  
TCCAAAAATTACACTTGTAAAGTAGCGCCACCGAACAAAACATACCAAAGA  
ATCAGTTTTGATACGAGTAGAGGAACTTTACAAGAAAGCAAATGTGAAGAC  
GAAGAGAAATCATTTTCATGGCCGTATAAATAGCCATACACCATGAAGAC  
CCCCTCCCATCCTCCATCCTTCACACATTTGGAGCACAAAATTCACACT  
AAACAATCAAGAGTAACCAAAAAATCCACCATGAAGATCTTCTTGGTCTTT  
GCCCTCCTCGTTGTATCAACGATCATCACCACCGCGACCGCGCAGCTCGA  
CCCTAGCATCCATGTACAAGAAAGGCCACAACAATCGTTTCCGCAGCAGC  
AACCATTACCCAACAACAACCATTCCCCGCTGCAAGAGCCACAACAACCA  
CTATTCCAGCAACAACAACCGTATCCACAACAGTCACTTCGCCAACAACA  
ACTTCCCCAGCAACATTTATTTCCGCAGCAACCGCCGAACAACAATTTTC  
CATAGTAGATGCCACTTCCGCATCAACAACAATAATTCCCCGAACAACA  
CAACCCCAACAACAACAACCATTTTACCAATATCAACAACCATTAACACA  
ACAACCATAACGCGAGAGCAACCATTGCCACAACAACAACCTTCTGTGG  
AGGAAAACCAACAATTGAACTTGTGCAAGGAGTTCTGCTGCAGCAGTGC  
AACCCGGAGGAGAAAGTGCATTACTGCAGTCAATGATCCCGTTCTCTCCG  
ACCAAAGACCTCGCAACAGAACAACCTGCCAGTTGAAGCGGCAACAATGTT  
GTCGACAACCTTGACATATCAGCGAGCCGTCCCGATGTCCGGCCATCCAC  
AACATTGTGCACGCCATCATCATGCAACAACAACAACAACATGTGGATAG  
AGGTTTTCGTCCAGCCTCAACCACAACAGTTGGGCCAGGGAATGCCCATGC  
AGCCTCAACATCAATTGGGCCAGGGCTTAAGCCTACCTCAACAACCTAGCC  
CAGTTCAAGTTGGTTAGGTTACTTGTGATTTCAGACCTTGCCTATGTTATG  
CAATGTGCATGTCCCATCTGATTGCTACACCATTAGTGCACCATTTGGTG  
GCATCACTGCCTACAACGGTGGACAAATGAATCACAAGAGTTGTACTACT  
AT

Supplementary Figure S1. Sequence of novel  $\gamma$ -gliadin He-1 and probesets positions. The primer sequences for PCR are indicated with arrow. The start and stop codon are boxed.

Probeset (Ta.9940.1.A1\_at) sequence cover from 10 to 169bp in square bracket. Probeset (Ta.6175.2.A1\_x\_at) sequences cover from 492 to 611bp, and probesets (Ta.6175.1.S1\_at, and Ta.6175.1.S1\_x\_at) cover from 588 to 1007bp)

```

1         10         20         30         40         50
|         |         |         |         |         |
AACAAATCAAAGAGTAACCACAAATTCACCATGAAGATCTTCATGGTCTTTG
CCCTCCTCGTTGCATCAACGACCATCACCACCGCGACCGCACAGCTCGAC 100
CCTCGCATCCATGACCAAGAAAGGCCACAACAATCGTTTCTGCAACAGCA
ACCACTTATCCAGCAACA]CCATACCCGCCTCAAGAGCCACAACAACCAC 200
TATTCCCGCAAAAAGAGCCACAACAACCATTTCCGCTGCAGCAGCCACAA
TACCAGCAACAACAACCGTATCCACAACAACCACTTCCCCAAGAACAAC 300
TCCCCAGCAACATTTATTTCCGCGAGCAGCCGCCACAACAACAATTTCCAC
AACAGATGCCACTTCCGCATCAACAACAACATTTCCCGCAACAACAACAA 400
CAACAACAACAACAAGAACAACACTCCCACAACAACACTCCACAATTTCCGCA
ACAACAACCATTTTCCCAATATCAACAACCATTAACACAAC[AACCATACT 500
CGCAAGAGCAACCATTGCCACAACAACAACCTTCTGTAGAGGAAAAACAA
CAATTGAACTTGTGCAAGGAGTTCCCTCCTGCAGCAGT]GTAACCCAGAGGA 600
GAAACTGTCGT]TACTCCAGTCAGTGATCCCGTTCCTCCGACCAAAGACCT
CGCAACAGAACAGCTGCCAGTTGAAGCGACTACAATGTTGTGACAAC 700
GCACATATCAGTGAACCGTCCCGATGCCCGGCCATCCACAACATTGTGCA
TGCCATCGTCATGCAACAACAACATGTGGATAGAGGTTTCGGCCAGCCTC 800
AACCACAACAGTTGGGCCAGGAAATGCCCATGCAGCCTCAACATCAATTG
GGCCAGCACTCTATCCTACCTCAACAACACTAGCCAGTACAAGTTGGTTAG 900
GTTACTTGTGATTGAGACCCTTCCCTATGTTATGCAACGTGCATGTCCCGT
CTGATTGCTACACCATTACTGCACCATTTGGTAGCATGACTGCCTACAAT 1000
GGTGGACAA]TGAATCACAATAGTTGTACTACTA 1034

```

Supplementary Figure S2. Neighbour-joining tree of 129  $\gamma$ -gliadins from *Triticum*, *Aegilops* species and *Hordeum chilense* (based on full length protein sequences).

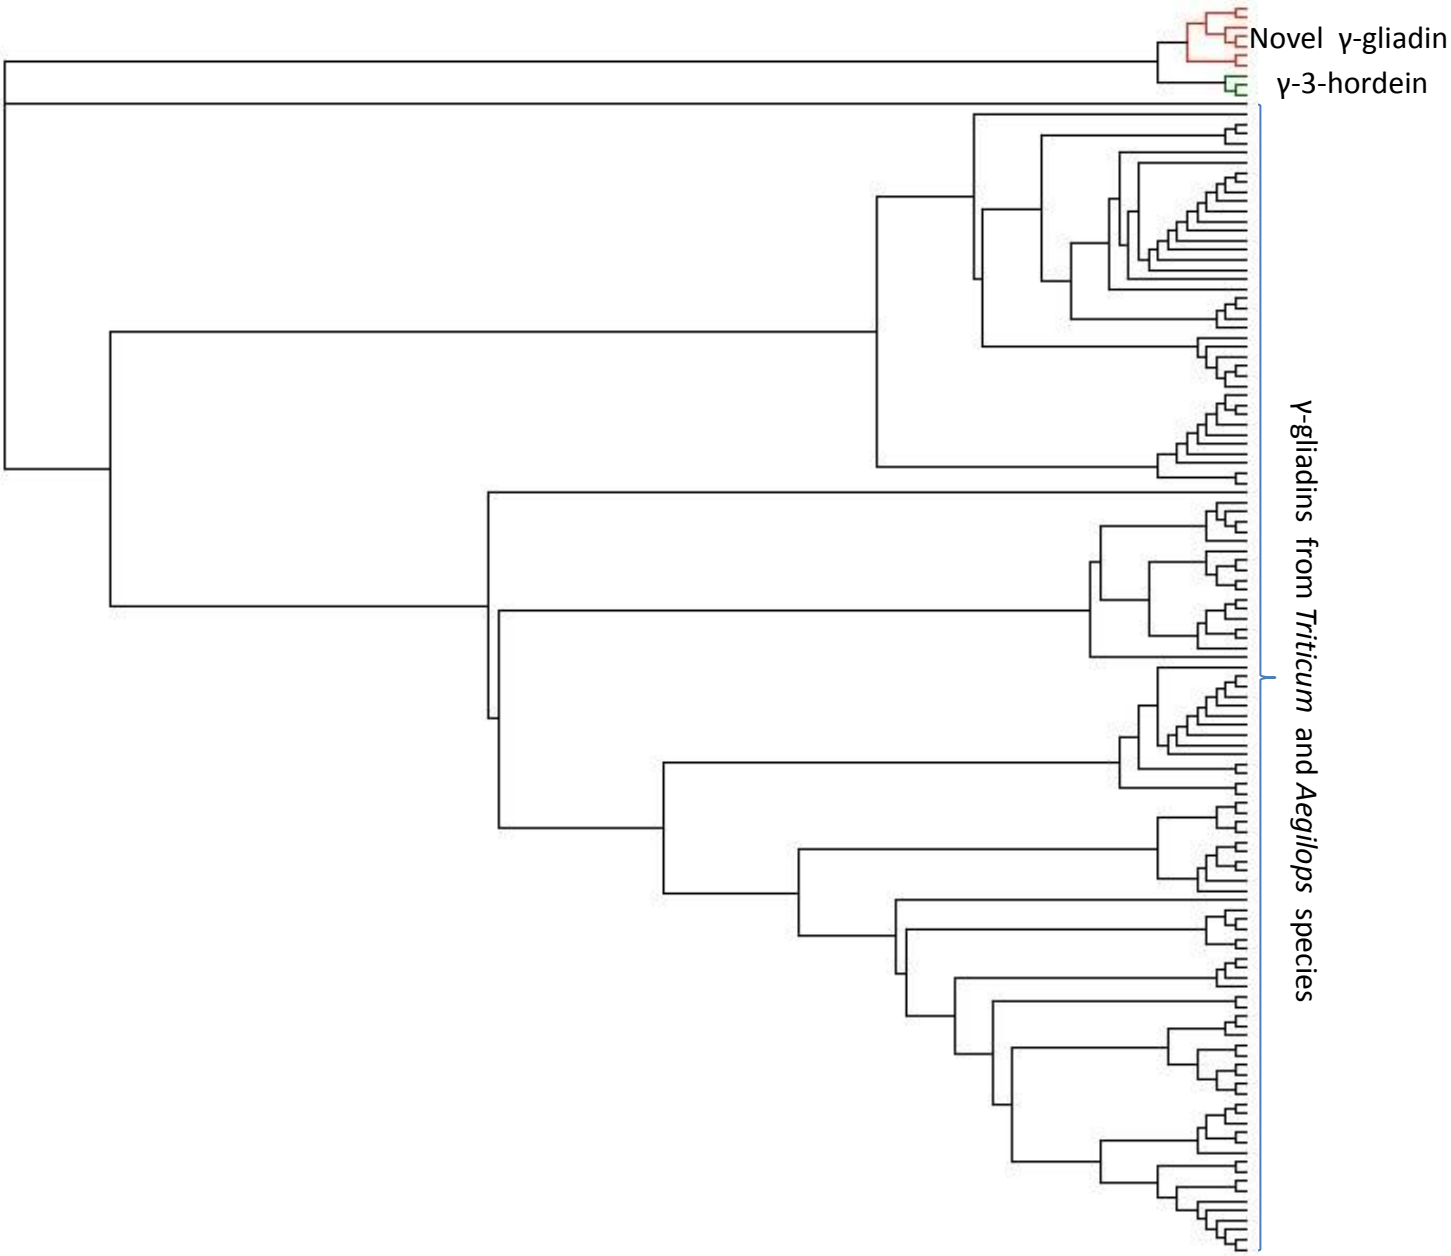

Supplement: supp_ers318_jexbot083352_file001.pdf [file supp_ers318_jexbot083352_file001.pdf]
